# Supplementary material
Source: publisher site journal article supplement (https://www.dovepress.com/get_supplementary_file.php?f=244748.docx)
Supplement: Supplementary file 1 [file get_supplementary_file.php]

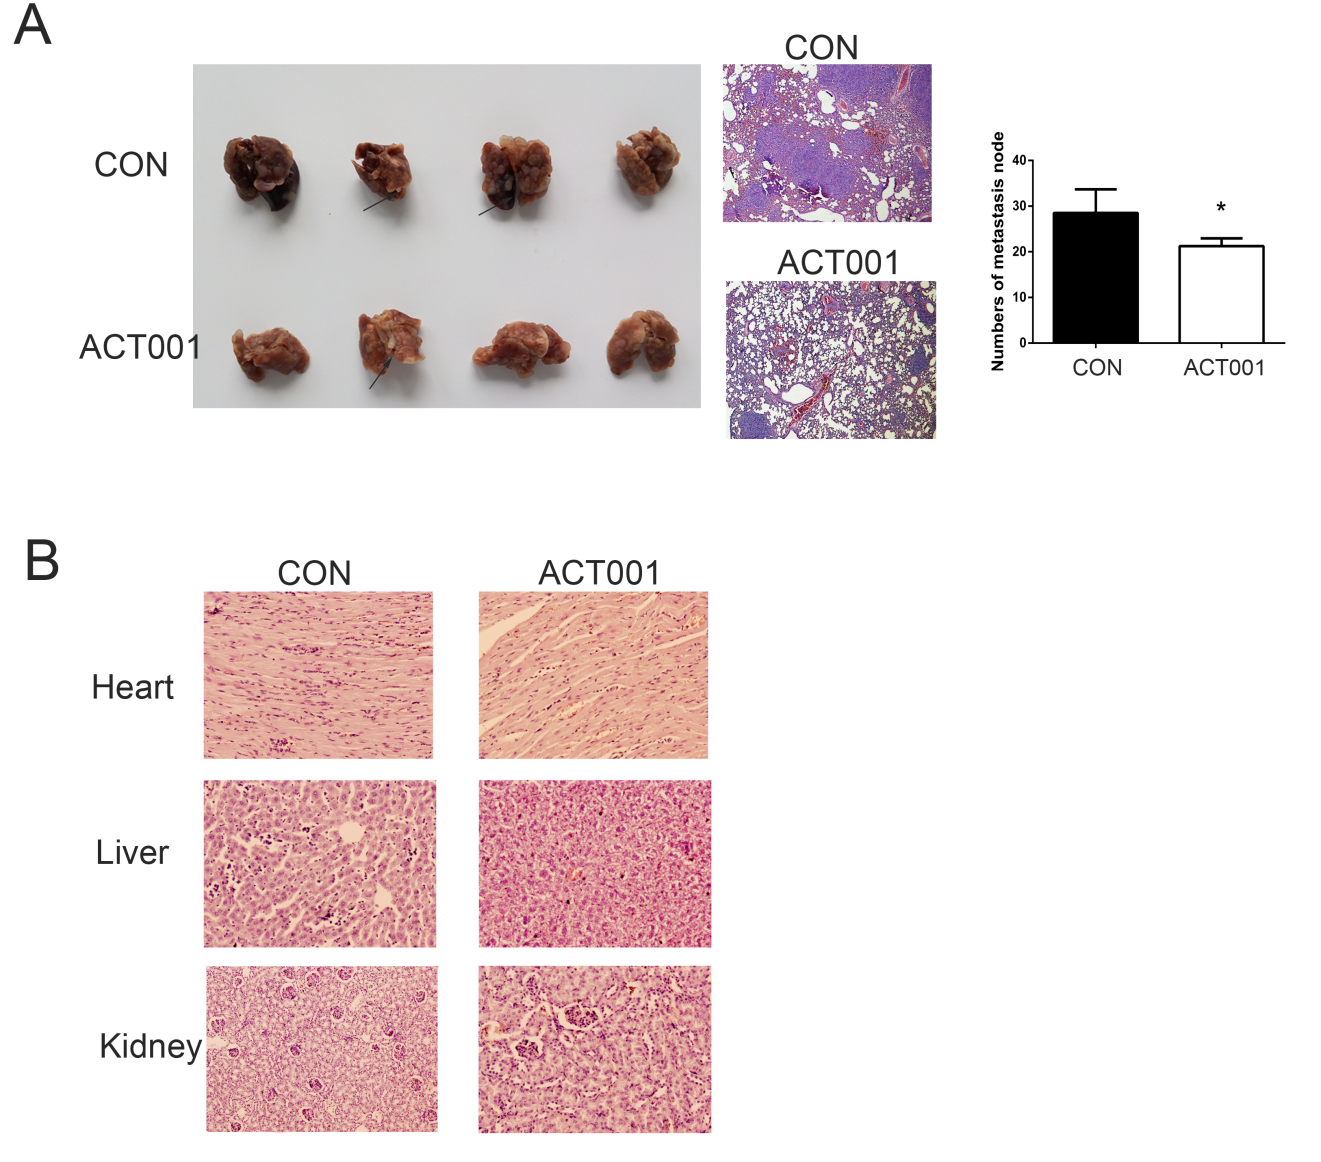


Supplementary Figure 1. (A) ACT001 decreased lung metastasis. 4T1 tumor-bearing mice were treated with sterile water or 100 mg/kg ACT001 for 18 d. At 35 d after 4T1 cell inoculation, lung metastases were assessed grossly and microscopically. Data are presented as means ± SD values for each treatment group (n = 4). Black arrows indicate metastatic nodules. Excised lung metastases were visualized through hematoxylin and eosin (HE) staining. (B) Representative results of HE staining are shown for toxicity evaluation. **P* < 0.05 versus the vehicle control.
